# Supplementary material for: Sustaining Enrollment in Health Insurance for Vulnerable Populations: Lessons From Massachusetts
Source: Atypon-hosted journal article supplement (doi:10.1176/appi.ps.201200155), 2013-01-15

# MassHealth and Commonwealth Care Initial Enrollment Process Map

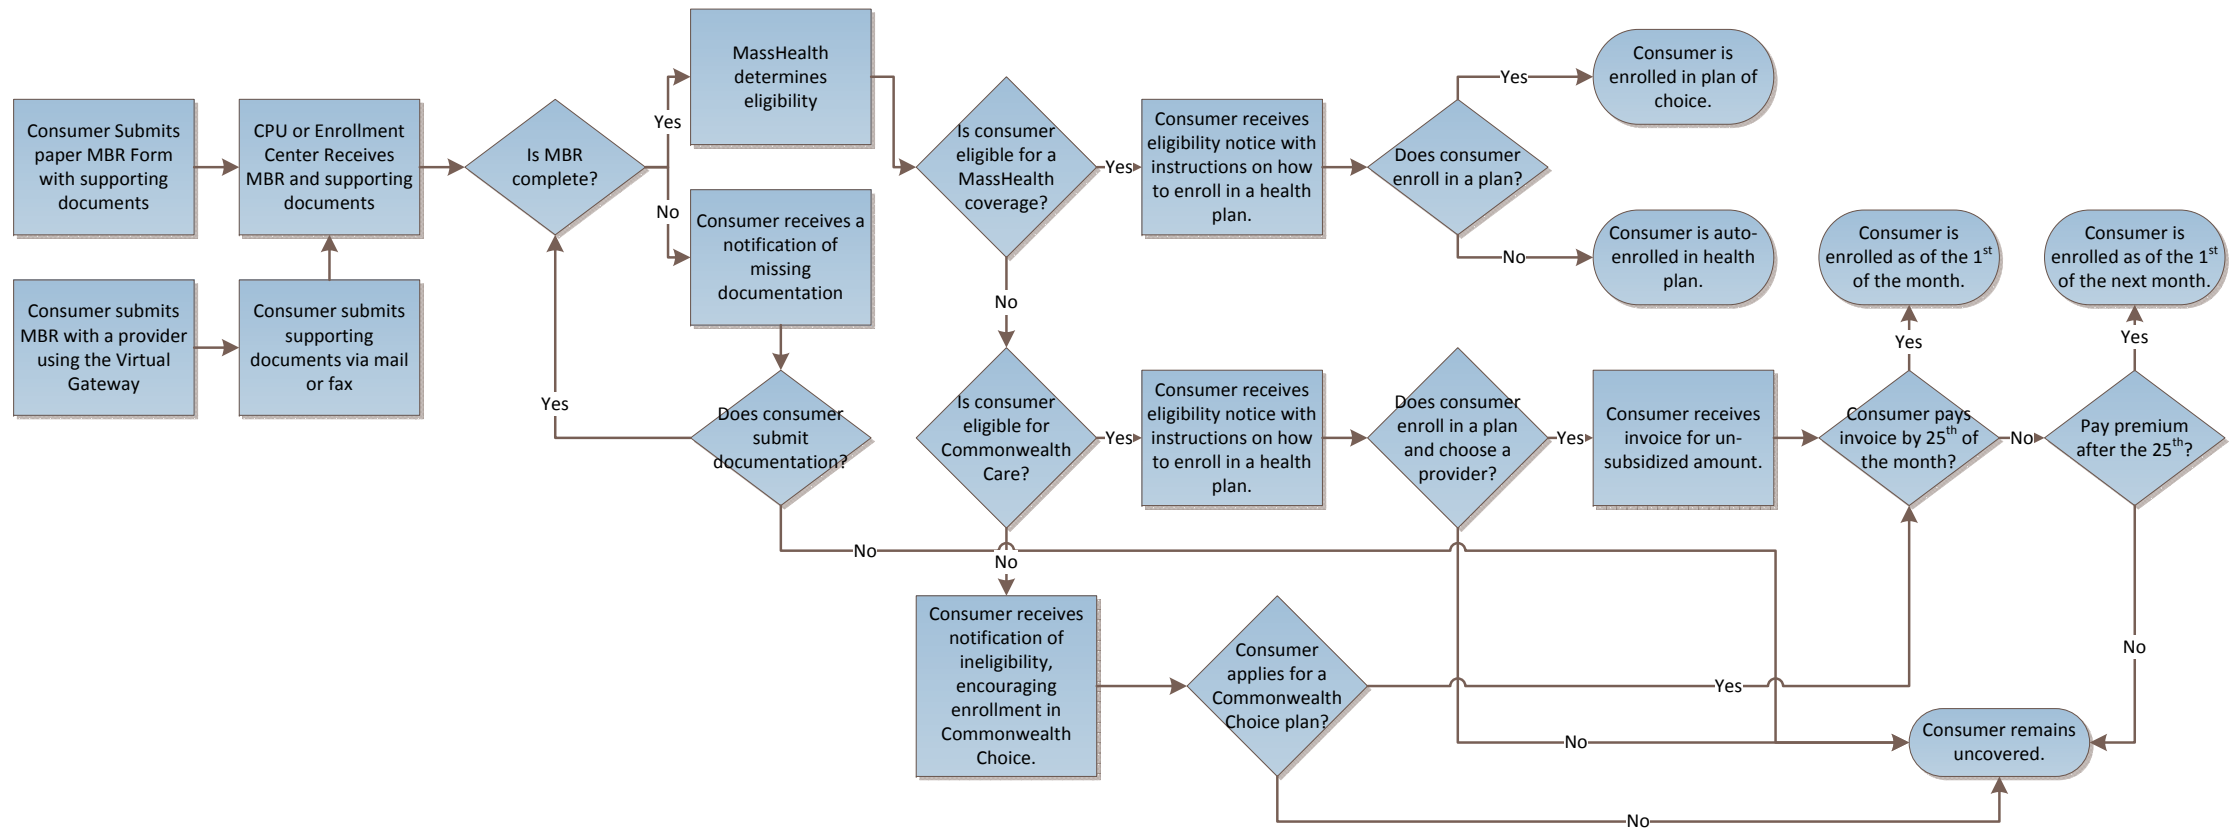

# MassHealth and Commonwealth Care Continued Enrollment Process Map

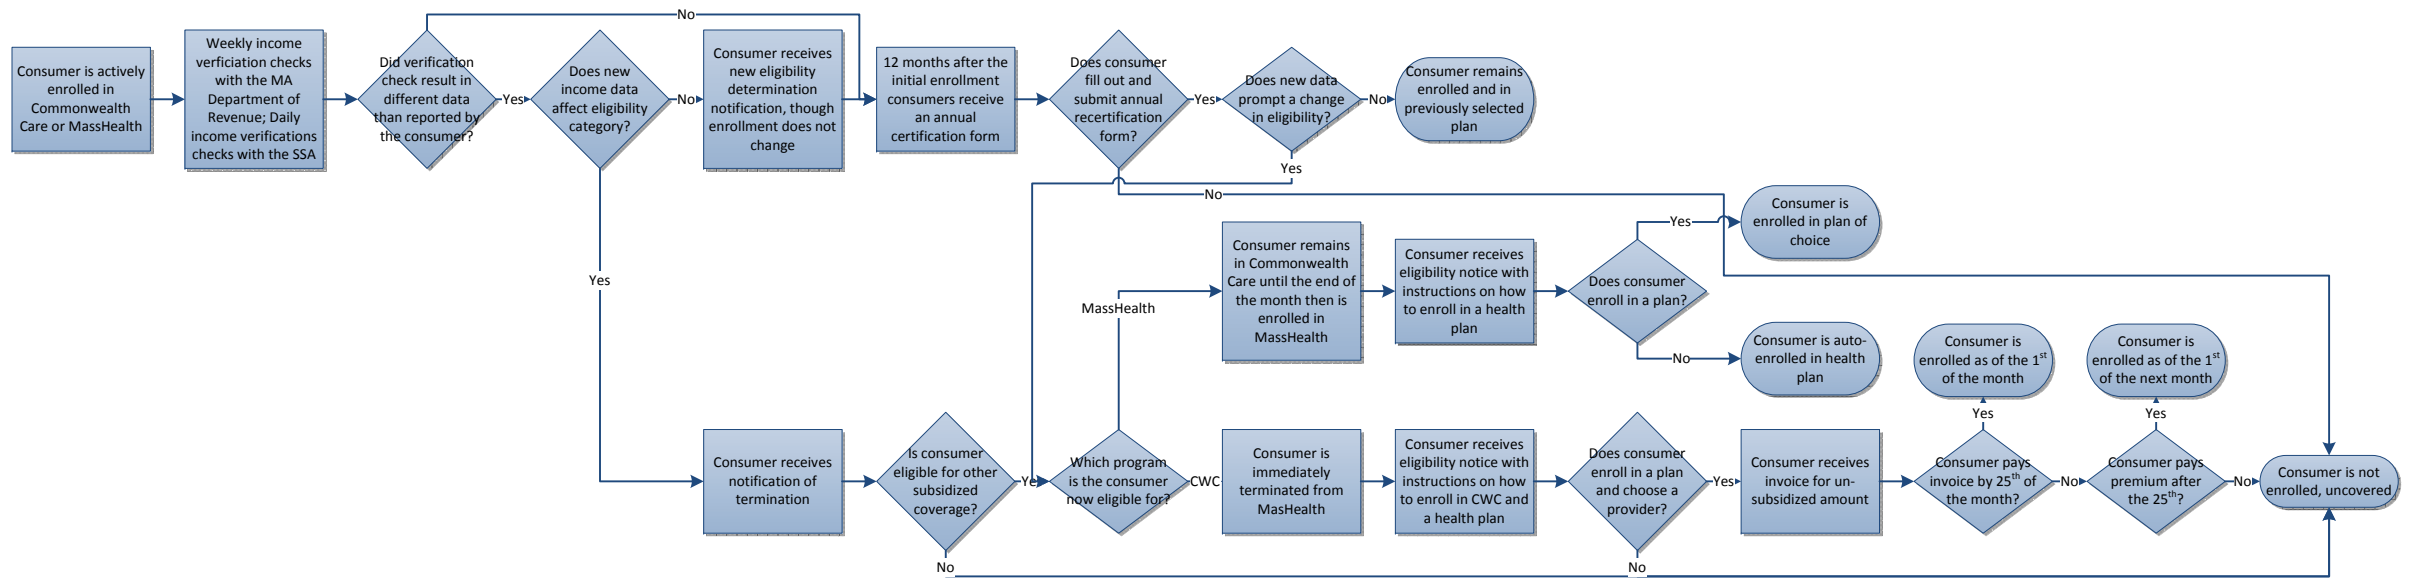

Supplement: 360_ds001.pdf [file 360_ds001.pdf]
